# Supplementary material
Source: HighWire-hosted journal article supplement (https://fn.bmj.com/content/105/1/98)
Supplement: inline-supplementary-material-1 [file inline-supplementary-material-1.pdf]

## PubMed

#1 Neonatal – n= 699,198

#2 Infant – n= 1,143,803

#3 Baby – n= 1,161,625

#4 Neonatal resuscitation – n= 13,975

#5 Delivery room – n= 10,130

#6 Serious game – n= 739

#7 Computer game – n= 8,318

#8 Board game – n=415

#9 Screen-based simulation – n=50

#10 Table-top simulation – n=36

#11 Video game – n=6,610

#12 Virtual reality – n=9,265

#13 #1 OR #2 OR #3 AND (#6 OR #7 OR #8 OR #9 OR #10 OR #11 OR #12) – n= 8, 87, 7,  
33, 0, 84, 44

#14 #4 AND (#6 OR #7 OR #8 OR #9 OR #10 OR #11 OR #12) – n=1, 1, 0, 2, 0, 0, 2

#15 #5 AND (#6 OR #7 OR #8 OR #9 OR #10 OR #11 OR #12) – n= 3, 4, 0, 1, 0, 4, 13

## Google Scholar

#1 Neonatal – n= ~2,690,000

#2 Infant – n= ~3,380,000

#3 Baby – n= ~3,340,000

#4 Neonatal resuscitation – n= ~151,000

#5 Delivery room – n= ~3,840,000

#6 Serious game – n= ~3,080,000

#7 Computer game – n= ~3,280,000

#8 Board game – n= ~3,100,000

#9 Screen based simulation – n= ~1,250,000

#10 Table top simulation – n= ~3,480,000

#11 Video game – n= ~2,370,000

#12 Virtual reality – n= ~2,790,000

#13 #4 AND (#6 OR #7 OR #8 OR #9 OR #10 OR #11 OR #12) – n= ~3,230, 2,580, 3,070,  
6,220, 14,500, 2,120, 2,700

Cochrane Central Register of Controlled Trials

#1 Neonatal – n= 14,076

#2 Infant – n= 47,599

#3 Baby – n= 4,485

#4 Neonatal resuscitation – n= 455

#5 Delivery room – n= 919

#6 Serious game – n= 168

#7 Computer game – n= 780

#8 Board game – n= 132

#9 Screen based simulation – n= 171

#10 Table top simulation – n= 6

#11 Video game – n= 1,201

#12 Virtual reality – n= 1,976

#13 #1 AND (#6 OR #7 OR #8 OR #9 OR #10 OR #11 OR #12) – n= 0, 0, 1, 0, 0, 1, 0  
#14 #2 AND (#6 OR #7 OR #8 OR #9 OR #10 OR #11 OR #12) – n= 2, 6, 1, 2, 0, 6, 5  
#15 #3 AND (#6 OR #7 OR #8 OR #9 OR #10 OR #11 OR #12) – n= 0, 0, 0, 1, 0, 2, 0  
#16 #4 AND (#6 OR #7 OR #8 OR #9 OR #10 OR #11 OR #12) – n= 0, 0, 0, 0, 0, 0, 0

Cochrane Central Register of Controlled Trials Reviews

#1 Neonatal – n= 721

#2 Infant – n= 1,063

#3 Baby – n= 820

#4 Neonatal resuscitation – n= 27

#5 Delivery room – n= 29

#6 Serious game – n= 3

#7 Computer game – n= 10

#8 Board game – n= 1

#9 Screen based simulation – n= 4

#10 Table top simulation – n= 0

#11 Video game – n= 7

#12 Virtual reality – n= 10

#13 #1 AND (#6 OR #7 OR #8 OR #9 OR #10 OR #11 OR #12) – n= 0, 0, 0, 0, 0, 0, 0

#14 #2 AND (#6 OR #7 OR #8 OR #9 OR #10 OR #11 OR #12) – n= 0, 0, 0, 0, 0, 0, 0

#15 #3 AND (#6 OR #7 OR #8 OR #9 OR #10 OR #11 OR #12) – n= 0, 0, 0, 0, 0, 0, 0

#16 #4 AND (#6 OR #7 OR #8 OR #9 OR #10 OR #11 OR #12) – n= 0, 0, 0, 0, 0, 0, 0
